# Supplementary material for: Use of selective serotonin-reuptake inhibitors in the first trimester and risk of cardiovascular-related malformations: a meta-analysis of cohort studies
Source: PubMed Central journal article supplement (PMC5318893; doi:10.1038/srep43085), 2017-02-21
Supplement: srep43085-s1.pdf [file srep43085-s1.pdf]

**Use of selective serotonin-reuptake inhibitors in the first trimester and risk of cardiovascular-related malformations: a meta-analysis of cohort studies**

Tie-Ning Zhang<sup>1</sup>, Shan-Yan Gao<sup>2</sup>, Zi-Qi Shen<sup>3</sup>, Da Li<sup>3</sup>, Cai-Xia Liu<sup>3</sup>, Hai-Chen Lv<sup>4</sup>, Yuan Zhang<sup>5</sup>, Ting-Ting Gong<sup>3</sup>, Xin Xu<sup>2</sup>, Chao Ji<sup>2</sup>, Qi-Jun

Wu<sup>2,\*</sup>

**Supplementary Table S1. Characteristics of cohort studies in the meta-analysis**

| <b>First author<br/>(ref), year,<br/>location</b>         | <b>No. of<br/>cohort/cases</b> | <b>Study<br/>period</b> | <b>Outcomes</b>                                   | <b>Risk estimates<br/>(95% CI)</b> | <b>Adjusted factors</b>                                                                                                 |
|-----------------------------------------------------------|--------------------------------|-------------------------|---------------------------------------------------|------------------------------------|-------------------------------------------------------------------------------------------------------------------------|
| Furu et al <sup>30</sup> ,<br>2015, Europe                | 2,303,647                      | 1996-2010               |                                                   | Odds Ratio                         | Maternal age, year of birth, birth order, smoking,<br>maternal diabetes, country, and use of other<br>prescribed drugs. |
|                                                           | 27,309                         |                         | Any cardiac defect                                | 1.15 (1.05-1.26)                   |                                                                                                                         |
|                                                           | 17,879                         |                         | ASD and VSD                                       | 1.17 (1.05-1.31)                   |                                                                                                                         |
|                                                           | 1,095                          |                         | Atrioventricular<br>septal defect                 | 1.22 (0.77-1.91)                   |                                                                                                                         |
|                                                           | 2,261                          |                         | Conotruncal and<br>major arch Anomalies           | 0.95 (0.67-1.35)                   |                                                                                                                         |
|                                                           | 2,641                          |                         | Left ventricular<br>outflow tract<br>Obstruction  | 1.09 (0.80-1.49)                   |                                                                                                                         |
|                                                           | 2,778                          |                         | Right ventricular<br>outflow tract<br>Obstruction | 1.48 (1.15-1.89)                   |                                                                                                                         |
|                                                           | 657                            |                         | Situs anomalies and<br>looping defect             | 1.00 (0.52-1.90)                   |                                                                                                                         |
| Berard<br>et al <sup>31</sup> , 2015,<br>North<br>America | 18,493                         | 1998-2010               |                                                   | Risk Ratio                         | Maternal age, welfare status, diabetes, .<br>hypertension,asthma,and other medication use                               |
|                                                           | 405                            |                         | Cardiac<br>malformations                          | 1.10 (0.82-1.48)                   |                                                                                                                         |
|                                                           | 322                            |                         | ASD/VSD                                           | 1.30 (0.99-1.70)                   |                                                                                                                         |

**Supplementary Table S1. Continued**

| <b>First author<br/>(ref), year,<br/>location</b>             | <b>No. of<br/>cohort/cases</b> | <b>Study<br/>period</b> | <b>Outcomes</b>                             | <b>Risk estimates<br/>(95% CI)</b> | <b>Adjusted factors</b>                                                                                                                                                                                                                            |
|---------------------------------------------------------------|--------------------------------|-------------------------|---------------------------------------------|------------------------------------|----------------------------------------------------------------------------------------------------------------------------------------------------------------------------------------------------------------------------------------------------|
| Ban et al <sup>32</sup> ,<br>2014, Europe                     | 349,127                        | 1990-2009               | Specific heart anomalies                    | Odds Ratio<br>1.14 (0.89-1.45)     | Maternal age at the end of pregnancy, year of childbirth,townsend deprivation quintile, maternal smoking history,BMI before pregnancy, and maternal diabetes,hypertension, asthma, and epilepsy in the year before conception or during pregnancy. |
|                                                               | 2,512                          |                         | Septal defect                               | 0.89(0.63-1.27)                    |                                                                                                                                                                                                                                                    |
|                                                               | N/A                            |                         | ASD                                         | 1.68 (0.98-2.91)                   |                                                                                                                                                                                                                                                    |
|                                                               | N/A                            |                         | VSD                                         | 0.63(0.38-1.03)                    |                                                                                                                                                                                                                                                    |
|                                                               | N/A                            |                         | LVOTD                                       | 1.05 (0.20-11.24)                  |                                                                                                                                                                                                                                                    |
|                                                               | N/A                            |                         | RVOTD                                       | 2.22 (0.98-5.03)                   |                                                                                                                                                                                                                                                    |
| Huybrechts<br>et al <sup>33</sup> , 2014,<br>North<br>America | 949,504                        | 2000-2007               | Cardiac malformations                       | Odds Ratio<br>1.25 (1.13-1.38)     | N/A                                                                                                                                                                                                                                                |
|                                                               | 6,819                          |                         | VSD                                         | 1.20 (1.04-1.39)                   |                                                                                                                                                                                                                                                    |
|                                                               | 3,413                          |                         | Right ventricular outflow tract obstruction | 1.12 (0.87-1.45)                   |                                                                                                                                                                                                                                                    |
|                                                               | 1,106                          |                         | Other cardiac defect                        | 1.34 (1.17-1.54)                   |                                                                                                                                                                                                                                                    |
|                                                               | 3,458                          |                         |                                             |                                    |                                                                                                                                                                                                                                                    |

**Supplementary Table S1. Continued**

| <b>First author<br/>(ref), year,<br/>location</b>                 | <b>No. of<br/>cohort/cases</b> | <b>Study<br/>period</b> | <b>Outcomes</b>          | <b>Risk estimates<br/>(95% CI)</b> | <b>Adjusted factors</b>                                                                                                                                                                                                                                                                                                                                                                                                                                                                                                                                       |
|-------------------------------------------------------------------|--------------------------------|-------------------------|--------------------------|------------------------------------|---------------------------------------------------------------------------------------------------------------------------------------------------------------------------------------------------------------------------------------------------------------------------------------------------------------------------------------------------------------------------------------------------------------------------------------------------------------------------------------------------------------------------------------------------------------|
| Knudsen<br>et al <sup>34</sup> , 2014,<br>Europe                  | 72,280                         | 1995-2008               |                          | Odds Ratio                         | Maternal age, year of conception, use of<br>antiepileptics and/or insulin during first trimester.                                                                                                                                                                                                                                                                                                                                                                                                                                                             |
|                                                                   | 546                            |                         | CHD                      | 1.64 (0.89-3.00)                   |                                                                                                                                                                                                                                                                                                                                                                                                                                                                                                                                                               |
|                                                                   | 129                            |                         | Severe CHD               | 4.03 (1.75-9.26)                   |                                                                                                                                                                                                                                                                                                                                                                                                                                                                                                                                                               |
|                                                                   | 97                             |                         | ASD                      | 2.82 (0.88-9.04)                   |                                                                                                                                                                                                                                                                                                                                                                                                                                                                                                                                                               |
|                                                                   | 333                            |                         | VSD                      | 0.94 (0.35-2.53)                   |                                                                                                                                                                                                                                                                                                                                                                                                                                                                                                                                                               |
| 54                                                                | Pulmonary valve<br>stenosis    | 3.47 (0.83-14.5)        |                          |                                    |                                                                                                                                                                                                                                                                                                                                                                                                                                                                                                                                                               |
| Vasilakis-<br>Scaramozza<br>et al <sup>35</sup> , 2013,<br>Europe | 9,893                          | 1991-2002               |                          | Relative Risk                      | Prepregnancy BMI, maternal age, cigarette smoking<br>status, history of DM, insulin use, exposure to a<br>teratogen during the first trimester, history of<br>infertility, and premature delivery.                                                                                                                                                                                                                                                                                                                                                            |
| 35                                                                | Cardiovascular<br>anomalies    | 0.80 (0.40-1.90)        |                          |                                    |                                                                                                                                                                                                                                                                                                                                                                                                                                                                                                                                                               |
| Margulis<br>et al <sup>36</sup> , 2013,<br>Europe                 | 149,464                        | 1996-2010               |                          | Odds Ratio                         | Year of delivery, maternal age at<br>delivery, prepregnancy marital status, index of<br>multiple deprivation at the practice level, family<br>history of congenital malformations, prepregnancy<br>body mass, prepregnancy diabetes, cigarette<br>smoking, alcohol intake, diagnosis of depression in<br>baseline year, diagnosis of other mental<br>conditions in baseline year or contact with or<br>referral to a psychiatrist, number of health care<br>encounters in baseline year and number of<br>nonantidepressant drugs prescribed in baseline year. |
|                                                                   | 721                            |                         | Cardiac<br>malformations | 1.09 (0.66-1.79)                   |                                                                                                                                                                                                                                                                                                                                                                                                                                                                                                                                                               |
|                                                                   | N/A                            |                         | Septal defects           | 1.12 (0.60-2.09)                   |                                                                                                                                                                                                                                                                                                                                                                                                                                                                                                                                                               |

**Supplementary Table S1. Continued**

| <b>First author<br/>(ref), year,<br/>location</b>          | <b>No. of<br/>cohort/cases</b> | <b>Study<br/>period</b> | <b>Outcomes</b>                     | <b>Risk estimates<br/>(95% CI)</b> | <b>Adjusted factors</b>                                                                                      |
|------------------------------------------------------------|--------------------------------|-------------------------|-------------------------------------|------------------------------------|--------------------------------------------------------------------------------------------------------------|
| Nordeng<br>et al <sup>38</sup> , 2012,<br>Europe           | 63,395                         | 1999-2009               | Cardiovascular<br>anomalies         | Odds Ratio<br>1.51 (0.67-3.43)     | Maternal depression, maternal age at delivery,<br>parity, and use of psychotropic drugs during<br>pregnancy. |
|                                                            | 547                            |                         | ASD/VSD                             | 1.57 (0.64-3.87)                   |                                                                                                              |
| Jimenez-<br>Solem et al<br><sup>39</sup> , 2012,<br>Europe | 848,786                        | 1997-2009               | Congenital<br>malformation of heart | Odds Ratio<br>2.01 (1.60-2.53)     | Mother's age, parity, income, education, smoking,<br>And year of conception.                                 |
|                                                            | 7,832                          |                         | ASD                                 | 2.60 (1.84-3.68)                   |                                                                                                              |
|                                                            | 2,524                          |                         | Atrioventricular<br>septal defect   | 1.25 (0.31-5.02)                   |                                                                                                              |
|                                                            | N/A                            |                         | VSD                                 | 1.62 (1.05-2.50)                   |                                                                                                              |
|                                                            | 2,824                          |                         | Septal defect                       | 2.04 (1.53-2.72)                   |                                                                                                              |
| Colvin et al<br><sup>21</sup> ,<br>2011, other<br>regions  | 123,405                        | 2002-2005               | Cardiovascular<br>anomalies         | Odds Ratio<br>1.60 (1.10-2.31)     | N/A                                                                                                          |
|                                                            | 691                            |                         | Ostium secundum<br>type ASD         | 2.73 (1.26-5.89)                   |                                                                                                              |
|                                                            | 97                             |                         | VSD                                 | 0.99 (0.44-2.23)                   |                                                                                                              |
|                                                            | 218                            |                         |                                     |                                    |                                                                                                              |

**Supplementary Table S1. Continued**

| <b>First author<br/>(ref), year,<br/>location</b> | <b>No. of<br/>cohort/cases</b> | <b>Study<br/>period</b> | <b>Outcomes</b>                                                 | <b>Risk estimates<br/>(95% CI)</b> | <b>Adjusted factors</b>                                                                                                                                                                                 |
|---------------------------------------------------|--------------------------------|-------------------------|-----------------------------------------------------------------|------------------------------------|---------------------------------------------------------------------------------------------------------------------------------------------------------------------------------------------------------|
|                                                   | 382                            |                         | Bulbus cordis anomalies and anomalies of cardiac septal closure | 1.23 (0.71-2.15)                   |                                                                                                                                                                                                         |
|                                                   | 250                            |                         | Other congenital anomaly of heart                               | 1.77 (0.99-3.16)                   |                                                                                                                                                                                                         |
| Malm et al <sup>37</sup> ,<br>2011, Europe        | 635,583<br>8,253               | 1996-2006               | All major cardiovascular anomalies                              | Odds Ratio<br>1.09 (0.90-1.32)     | Age at the end of pregnancy, parity, year of pregnancy ending, smoking during pregnancy, purchase of other reimbursed psychiatric drugs during the first trimester, and maternal prepregnancy diabetes. |
|                                                   | 1,297                          |                         | ASD                                                             | 1.04 (0.64-1.69)                   |                                                                                                                                                                                                         |
|                                                   | 5,550                          |                         | VSD                                                             | 1.20 (0.96-1.50)                   |                                                                                                                                                                                                         |
|                                                   | 437                            |                         | Conotruncal heart defect                                        | 0.46 (0.14-1.46)                   |                                                                                                                                                                                                         |
|                                                   | 476                            |                         | Left ventricular outflow tract defects                          | 0.93 (0.40-2.13)                   |                                                                                                                                                                                                         |
|                                                   | 423                            |                         | Right ventricular outflow tract defects                         | 1.74 (0.85-3.57)                   |                                                                                                                                                                                                         |
|                                                   | 240                            |                         | Transposition of great arteries                                 | 0.60 (0.15-2.52)                   |                                                                                                                                                                                                         |

**Supplementary Table S1. Continued**

| <b>First author<br/>(ref), year,<br/>location</b>             | <b>No. of<br/>cohort/cases</b>      | <b>Study<br/>period</b> | <b>Outcomes</b>                                                            | <b>Risk estimates<br/>(95% CI)</b>                                                         | <b>Adjusted factors</b>                                                |
|---------------------------------------------------------------|-------------------------------------|-------------------------|----------------------------------------------------------------------------|--------------------------------------------------------------------------------------------|------------------------------------------------------------------------|
| Kornum<br>et al <sup>40</sup> , 2010,<br>Europe               | 216,042<br>1,429                    | 1991-2007               | Cardiac<br>malformations                                                   | Odds Ratio<br>1.70 (1.10-2.50)                                                             | Maternal smoking status, maternal age, birth order,<br>and birth year. |
| Merlob<br>et al <sup>20</sup> , 2009,<br>Other regions        | N/A<br>67,871<br>1,091              | 2000-2007               | Septal heart defect<br>Congenital heart<br>malformation                    | Relative Risk<br>2.17 (1.07-4.39)                                                          | N/A                                                                    |
| Pedersen<br>et al <sup>19</sup> , 2009,<br>Europe             | 493,113<br>4,004                    | 1996-2003               | Major cardiac<br>malformations                                             | Odds Ratio<br>1.44 (0.86-2.40)                                                             | Age, calendar year, income, marriage status,<br>tobacco smoking.       |
| Oberlander<br>et al <sup>22</sup> , 2008,<br>North<br>America | 2,327<br>11,957<br>529<br>81<br>225 | 1998-2001               | Septal heart defects<br>Cardiovascular<br>congenital defects<br>ASD<br>VSD | 1.99 (1.13-3.53)<br>Odds Ratio<br>1.36 (0.84-2.21)<br>3.28 (1.42-7.53)<br>1.12 (0.50-2.52) | N/A                                                                    |

**Supplementary Table S1. Continued**

| <b>First author<br/>(ref), year,<br/>location</b>     | <b>No. of<br/>cohort/cases</b>      | <b>Study<br/>period</b> | <b>Outcomes</b>                                                          | <b>Risk estimates<br/>(95% CI)</b>                                     | <b>Adjusted factors</b>                                                              |
|-------------------------------------------------------|-------------------------------------|-------------------------|--------------------------------------------------------------------------|------------------------------------------------------------------------|--------------------------------------------------------------------------------------|
| Davis et al <sup>41</sup> ,<br>2007, North<br>America | 87,407<br>682                       | 1996-2000               | Bulbus cordis<br>anomalies and<br>anomalies of cardiac<br>septal closure | Relative Risk<br>0.93 (0.50-1.73)                                      | Health system, maternal age, and birth season.                                       |
|                                                       | 506                                 |                         | Other congenital<br>anomalies of heart                                   | 0.88 (0.42-1.86)                                                       |                                                                                      |
| Kallen<br>et al <sup>42</sup> , 2007,<br>Europe       | 880,431<br>11,445<br>7,213<br>1,218 | 1995-2004               | Any cardiac defect<br>VSD and/or ASD<br>Unspecified cardiac<br>defect    | Odds Ratio<br>0.97 (0.77-1.21)<br>1.10 (0.84-1.44)<br>1.04 (0.42-2.15) | Year of birth, maternal age, parity, smoking, and $\geq 3$<br>Previous miscarriages. |
| Kulin et al <sup>43</sup> ,<br>1998, North<br>America | 534<br>6                            |                         | Cardiac<br>malformations                                                 | Relative Risk<br>0.53 (0.10-2.86)                                      | N/A                                                                                  |

Abbreviations: ASD, atrial septal defect; BMI, body mass index; CHD, congenital heart defect; DM, diabetes mellitus; LVOTD, left ventricular outflow tract defect; N/A, not available; RVOTD, right ventricular outflow tract defect; VSD, ventricular septal defect.



**Supplementary Table S2. Methodological quality of cohort studies included in the meta-analysis<sup>a</sup>**

| First author<br>(reference), publication<br>year       | Representativeness<br>of the exposed<br>cohort | Selection<br>of the<br>unexposed<br>cohort | Ascertainment<br>of exposure | Outcome of<br>interest not<br>present at<br>start of study | Control for<br>important<br>factor or<br>additional<br>factor <sup>b</sup> | Assessment<br>of outcome | Follow-up<br>long enough<br>for outcomes<br>to occur <sup>c</sup> | Adequacy<br>of<br>follow-up<br>of cohorts<br><sup>d</sup> |
|--------------------------------------------------------|------------------------------------------------|--------------------------------------------|------------------------------|------------------------------------------------------------|----------------------------------------------------------------------------|--------------------------|-------------------------------------------------------------------|-----------------------------------------------------------|
| Furu et al <sup>30</sup> , 2015                        | *                                              | *                                          | *                            | *                                                          | **                                                                         | *                        | *                                                                 | *                                                         |
| Berard et al <sup>31</sup> , 2015                      | *                                              | *                                          | *                            | *                                                          | *                                                                          | *                        | *                                                                 | *                                                         |
| Ban et al <sup>32</sup> , 2014                         | *                                              | *                                          | *                            | *                                                          | **                                                                         | *                        | -                                                                 | -                                                         |
| Huybrechts et al <sup>33</sup> , 2014                  | *                                              | *                                          | *                            | *                                                          | -                                                                          | *                        | *                                                                 | *                                                         |
| Knudsen et al <sup>34</sup> , 2014                     | *                                              | *                                          | *                            | *                                                          | *                                                                          | *                        | *                                                                 | *                                                         |
| Vasilakis-<br>Scaramozza et al <sup>35</sup> ,<br>2013 | *                                              | *                                          | *                            | *                                                          | **                                                                         | *                        | *                                                                 | *                                                         |
| Margulis et al <sup>36</sup> , 2013                    | *                                              | *                                          | *                            | *                                                          | **                                                                         | *                        | *                                                                 | *                                                         |
| Nordeng et al <sup>38</sup> , 2012                     | *                                              | *                                          | *                            | *                                                          | *                                                                          | *                        | -                                                                 | -                                                         |
| Jimenez-<br>Sole et al <sup>39</sup> , 2012            | *                                              | *                                          | *                            | *                                                          | **                                                                         | *                        | *                                                                 | *                                                         |
| Colvin et al <sup>21</sup> , 2011                      | *                                              | *                                          | *                            | *                                                          | -                                                                          | *                        | *                                                                 | *                                                         |
| Malm et al <sup>37</sup> , 2011                        | *                                              | *                                          | *                            | *                                                          | **                                                                         | *                        | -                                                                 | -                                                         |
| Kornum et al <sup>40</sup> , 2010                      | *                                              | *                                          | *                            | *                                                          | **                                                                         | *                        | *                                                                 | *                                                         |
| Merlob et al <sup>20</sup> , 2009                      | *                                              | *                                          | *                            | *                                                          | -                                                                          | *                        | *                                                                 | *                                                         |
| Pedersen et al <sup>19</sup> , 2009                    | *                                              | *                                          | *                            | *                                                          | **                                                                         | *                        | *                                                                 | *                                                         |
| Oberlander et al <sup>22</sup> , 2008                  | *                                              | *                                          | *                            | *                                                          | -                                                                          | *                        | -                                                                 | -                                                         |
| Davis et al <sup>41</sup> , 2007                       | *                                              | *                                          | *                            | *                                                          | *                                                                          | *                        | *                                                                 | *                                                         |
| Kallen et al <sup>42</sup> , 2007                      | *                                              | *                                          | *                            | *                                                          | **                                                                         | *                        | -                                                                 | -                                                         |
| Kulin et al <sup>43</sup> , 1998                       | *                                              | *                                          | *                            | *                                                          | -                                                                          | *                        | -                                                                 | -                                                         |

- <sup>a</sup> A study could be awarded a maximum of one star for each item except for the item Control for important factor or additional factor. The definition/explanation of each column of the Newcastle-Ottawa Scale is available from ([http://www.ohri.ca/programs/clinical\\_epidemiology/oxford.asp](http://www.ohri.ca/programs/clinical_epidemiology/oxford.asp)).
- <sup>b</sup> A maximum of 2 stars could be awarded for this item. Studies that controlled for age received one star, whereas studies that controlled for other important confounders such as smoking and/or alcohol using received an additional star.
- <sup>c</sup> A cohort study with a follow-up time >9 months was assigned one star.
- <sup>d</sup> A cohort study with a follow-up rate >75% was assigned one star.
